# Supplementary material for: The influence of auditory-motor coupling on fractal dynamics in human gait
Source: PubMed Central journal article supplement — Sci Rep. 2014 Aug 1;4:5879. doi: 10.1038/srep05879 (PMC4118321; doi:10.1038/srep05879), 2014-08-01
Supplement: srep05879-s1.pdf [file srep05879-s1.pdf]

Manuscript Title: The influence of auditory-motor coupling on fractal dynamics in human gait

Authors: Nathaniel Hunt, Denise McGrath, Nicholas Stergiou

White noise based music: Fur Elise music with white noise based inter-beat interval structure

Pink noise based music: Fur Elise music with pink noise based inter-beat interval structure

Brown noise based music: Fur Elise music with brown noise based inter-beat interval structure
