# Supplementary material for: The influence of auditory-motor coupling on fractal dynamics in human gait
Source: PubMed Central journal article supplement — Sci Rep. 2014 Aug 1;4:5879. doi: 10.1038/srep05879 (PMC4118321; doi:10.1038/srep05879), 2014-08-01
Supplement: srep05879-s2.pdf [file srep05879-s2.pdf]

# The influence of auditory-motor coupling on fractal dynamics in human gait

**Nathaniel Hunt<sup>1,2</sup>**

**\* Denise McGrath<sup>3</sup>**

**Nicholas Stergiou<sup>1</sup>**

---

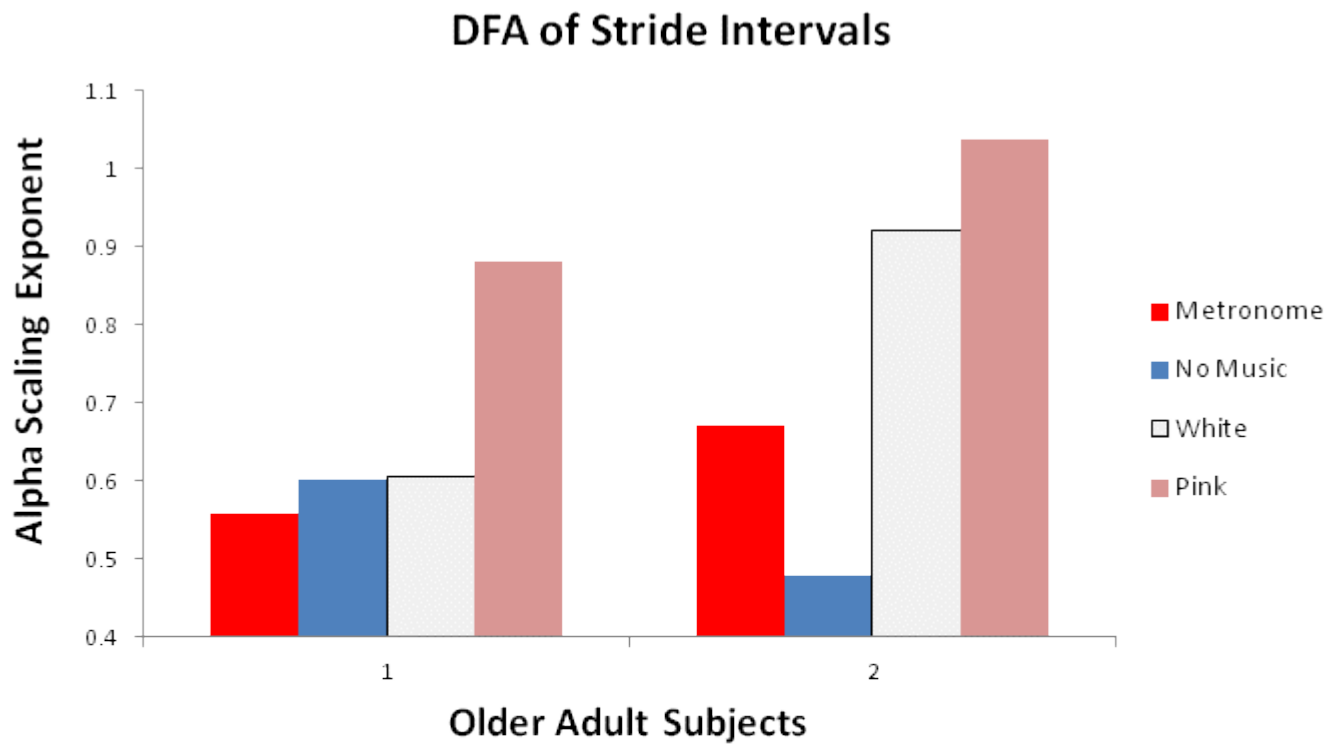

Supplementary Material: Detrended Fluctuation Analysis of stride intervals across four overground walking conditions (no music, metronomic music, pink noise based music, white noise based music) in two older adults: participant 1, female aged 81 years; participant 2, male aged 81 years
